# Supplementary material for: Clarifying life lost due to cold and heat: a new approach using annual time series
Source: HighWire-hosted journal article supplement (doi:10.1136/bmjopen-2014-005640), 2015-04-01
Supplement: bmjopen-2014-005640supp.pdf [file bmjopen-2014-005640supp.pdf]

## Appendices

Note: the annual dataset and core code is available from the Dryad Digital Repository:

<http://dx.doi.org/10.6027/1136.1136><sup>22</sup>

### A: Data Discontinuities

| Start date  | Type of change     | Details                                                                                                                                  | Mortality affected | Analysis Oct-Sept year steps*                  |
|-------------|--------------------|------------------------------------------------------------------------------------------------------------------------------------------|--------------------|------------------------------------------------|
| <b>1958</b> | ICD & population   | Counts included non-civilians<br>ICD-6                                                                                                   | ALL                | 1957<br>1958                                   |
| <b>1965</b> | London Boundary    | Inner London (similar to London Area County but includes small part of Woolwich)                                                         | ALL                | 1964<br>1965                                   |
| <b>1966</b> | London Boundary    | Greater London – incorporates Outer London boroughs                                                                                      | ALL                | <b>1965</b><br><b>1966</b>                     |
| <b>1968</b> | ICD                | ICD-8 introduced, cardiovascular category widened                                                                                        | CVD                | <b>1967(CVD-RESP)</b><br><b>1968(CVD-RESP)</b> |
| <b>1976</b> | Data collection    | From weekly death registrations to daily death counts                                                                                    | ALL                | 1974<br>1975                                   |
| <b>1984</b> | ICD interpretation | Change in interpretation of rule 3 – fewer deaths attributed to respiratory causes                                                       | RESP               | <b>1983(CVD-RESP)</b><br><b>1984(CVD-RESP)</b> |
| <b>1993</b> | ICD interpretation | Reverse of rule 3 interpretation more respiratory deaths                                                                                 | RESP               | Bridging adjustment                            |
| <b>2001</b> | ICD                | ICD-10 introduced: 22% fewer respiratory deaths, especially pneumonia; some respiratory diseases (~5%), assigned to circulatory diseases | RESP<br>CVD        | Bridging adjustment                            |

\* two analysis years were affected for each Jan 1 change; bolded entries indicate used in main model, otherwise in sensitivity analyses only. ICD bridging correction factors were from Brock 2006<sup>1</sup>.

CVD=cardiovascular; Inflpneu=Influenza & Pneumonia; RESP=Respiratory

## B: Previously identified cold and heat thresholds for London.

| <b>Paper &amp; setting</b>                                              | <b>Focus:<br/>cold or heat?</b>             | <b>Threshold</b><br>(measure of daily<br>temperature used) | Notes regarding methodology used.                                                                                                                                 |
|-------------------------------------------------------------------------|---------------------------------------------|------------------------------------------------------------|-------------------------------------------------------------------------------------------------------------------------------------------------------------------|
| Keatinge et al <sup>2</sup><br>Multicity incl. London<br>1988 – 1992    | <b>Combined<br/>heat and cold</b>           | <b>19.3 to 22.3 °C<br/>(mean)</b>                          | Used the 3°C band of minimum mortality.<br>Incorporates 3 day lag for cold.                                                                                       |
| Carson et al <sup>3</sup><br>London<br>1900-1996                        | <b>Combined<br/>heat and cold</b>           | <b>15 °C<br/>(mean)</b>                                    | Cold & heat threshold common throughout<br>century of 15.0°C, although 1986-1996 cold<br>threshold was 19.5°C. Incorporates 14 day<br>lag for cold.               |
| Pattenden et al <sup>4</sup><br>London & Sofia<br>1993-1996             | <b>Combined<br/>heat and cold</b>           | <b>18 °C<br/>(mean)</b>                                    | Threshold common to London & Sofia.<br>Incorporates 2 day lag for heat; 2 week lag<br>for cold. 10 <sup>th</sup> & 90 <sup>th</sup> percentiles: 5.2°C to<br>21°C |
| Hajat et al <sup>5</sup><br>London, Delhi & Sao Paulo<br>1991-1994      | Heat (but<br>threshold for<br><b>both</b> ) | <b>20 °C<br/>(mean)</b>                                    | Threshold common to London, Delhi & Sao<br>Paulo. Incorporates 2 week lag for cold.                                                                               |
| Armstrong et al <sup>6</sup><br>London<br>1993-2006                     | Both –<br>individual<br>thresholds          | Cold: 12.1 °C (mean)<br>Heat: 22.3 °C (mean)               | Incorporates zero lags.                                                                                                                                           |
| Eurowinter 1997 <sup>7</sup><br>Multicity incl. London<br>1988-1992     | Cold                                        | Cold: 18 °C (mean)                                         | Common threshold. Incorporated 3 day lag.                                                                                                                         |
| Kovats et al <sup>8</sup><br>London<br>1994-2000                        | Heat                                        | Heat: 12 °C (mean)                                         | All-cause admissions                                                                                                                                              |
| Hajat et al <sup>9</sup><br>London<br>1976-1996                         | Heat                                        | Heat: 21.5 °C (mean)                                       | Threshold determined by 97 <sup>th</sup> percentile.<br>Increased mortality visible above 19°C                                                                    |
| Hajat et al <sup>10</sup><br>Multicity incl. London<br><b>1976-2003</b> | Heat                                        | Heat: 20.5 °C (mean)                                       |                                                                                                                                                                   |
| Baccini et al <sup>11</sup><br>Multicity incl. London<br>1992-2000      | Heat                                        | Heat: 23.9 °C (max)                                        | Apparent temperature                                                                                                                                              |
| Ishigami et al <sup>12</sup><br>London<br>1993-2003                     | Heat                                        | Heat: 20.4 °C (mean)                                       |                                                                                                                                                                   |
| Armstrong et al <sup>13</sup><br>England & Wales<br>1993-2006           | Heat                                        | Heat: 24.7 °C (max)                                        | Common threshold at 93 <sup>rd</sup> percentile across<br>England & Wales.                                                                                        |

## C : Model details

Main model

$$E(Y_i) = \exp \left( \beta_{\text{cold}} (\text{annual-cold}) + \beta_{\text{heat}} (\text{annual-heat}) + \text{steps}(\text{years } 1965,6) + \text{NCS}(\text{year},6 \text{ knots}) + \lambda(\text{influenza}\%) \right)$$

Where, for 52-week years starting  $i=1949\dots 2005$ , days  $j$ :

- $Y_i$  = annual death count
- $\text{annual\_cold} = \frac{\sum \max[(T_C - t_{ij}), 0]}{364}$
- $\text{annual\_heat} = \frac{\sum \max[(t_{ij} - T_H), 0]}{364}$
- $\text{steps}(\text{years } 1965,6)$ : indicator variable for  $\text{year} \geq 1965$  and  $\text{year} \geq 1966$  (boundary change)
- $\text{NCS}(\text{year}, 6\text{knots})$ : a natural cubic spline with six total knots (5df)
- $\text{influenza}\%$  : proportion of deaths coded as due to influenza; ICD7-8 equivalent
  - for 1949-1974 these were from the London weekly data
  - for 1975-2006 counts of influenza deaths among London residents were obtained directly from the Office of National Statistics.

The year starting Oct 1965 had one 6-day week due to reporting changes. For this year all counts were adjusted by a multiple 364/363.

Deaths counts were assumed to follow a Poisson distribution with scale overdispersion

In analyses of deaths due to respiratory and cardiovascular causes, additional steps were included in the model to allow for changes in ICD and coding known to affect one or the other of these categories.

## D: Residual analysis

These were carried out with x variables as for the main model but using the simple regression model for simplicity and in view of the similar result in this and the Poisson model. In the plots below stress standard for standardised residual.

Di: Distribution of residuals by calendar year

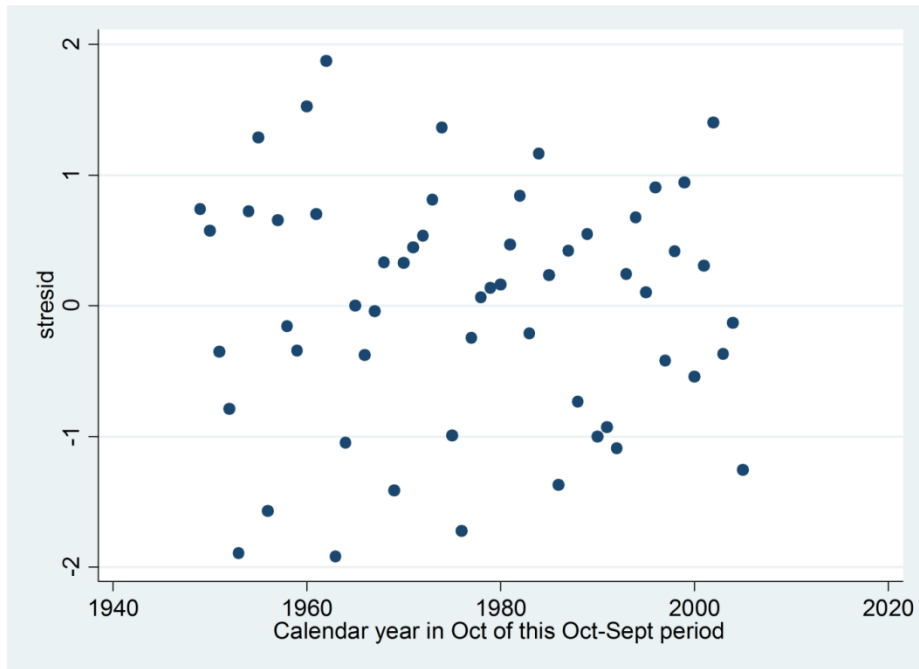

Dii: n of residuals by fitted log count

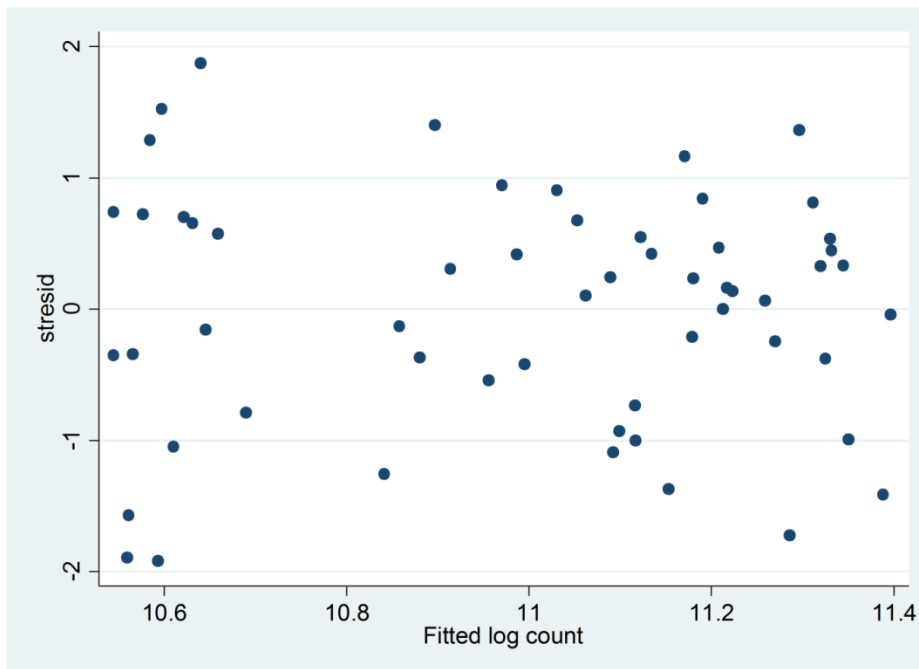

### Diii: Partial autocorrelation coefficients

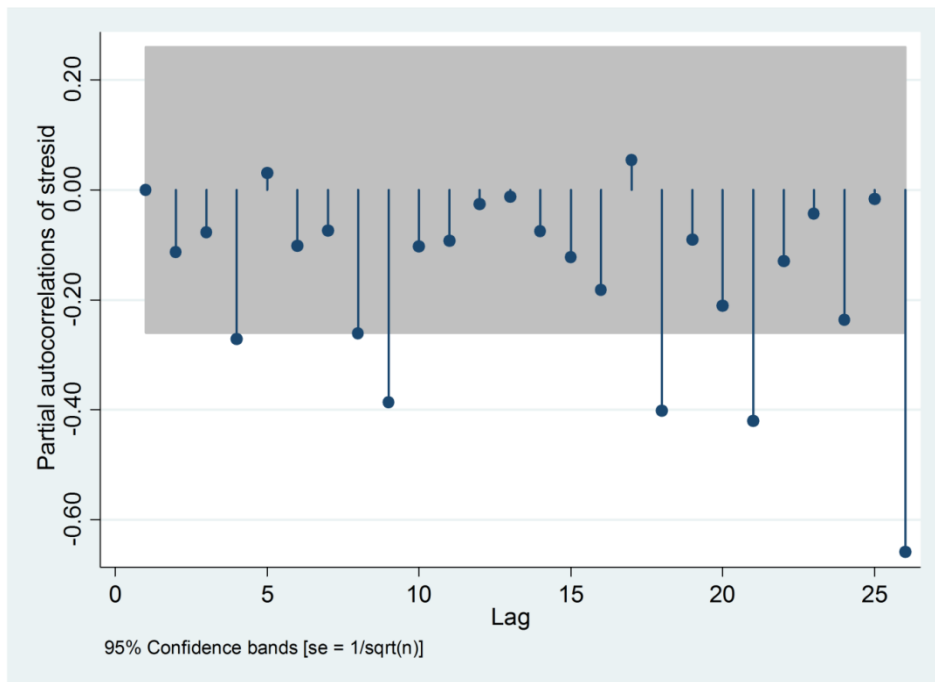

## References

1. Brock A, Griffiths C, Rooney C. The impact of introducing ICD-10 on analysis of respiratory mortality trends in England and Wales. *Health Stat Q* 2006(29):9-17.
2. Keatinge WR, Donaldson GC, Cordioli E, Martinelli M, Kunst AE, Mackenbach JP, et al. Heat related mortality in warm and cold regions of Europe: observational study. *BMJ* 2000;321(7262):670-3.
3. Carson C, Hajat S, Armstrong B, Wilkinson P. Declining vulnerability to temperature-related mortality in London over the 20th century. *American Journal of Epidemiology* 2006;164(1):77-84.
4. Pattenden S, Nikiforov B, Armstrong BG. Mortality and temperature in Sofia and London. *Journal of Epidemiology & Community Health* 2003;57(8):628-33.
5. Hajat S, Armstrong BG, Gouveia N, Wilkinson P. Mortality displacement of heat-related deaths: a comparison of Delhi, Sao Paulo, and London. *Epidemiology* 2005;16(5):613-20.
6. Armstrong B. Models for the relationship between ambient temperature and daily mortality. *Epidemiology* 2006;17(6):624-31.
7. Eurowinter G. Cold exposure and winter mortality from ischaemic heart disease, cerebrovascular disease, respiratory disease, and all causes in warm and cold regions of Europe. The Eurowinter Group. *Lancet* 1997;349(9062):1341-6.
8. Kovats RS, Hajat S, Wilkinson P. Contrasting patterns of mortality and hospital admissions during hot weather and heat waves in Greater London, UK. *Occupational & Environmental Medicine* 2004;61(11):893-8.
9. Hajat S, Kovats RS, Atkinson RW, Haines A. Impact of hot temperatures on death in London: a time series approach. *Journal of Epidemiology & Community Health* 2002;56(5):367-72.
10. Hajat S, Armstrong B, Baccini M, Biggeri A, Bisanti L, Russo A, et al. Impact of high temperatures on mortality: is there an added heat wave effect? *Epidemiology* 2006;17(6):632-8.
11. Baccini M, Biggeri A, Accetta G, Kosatsky T, Katsouyanni K, Analitis A, et al. Heat effects on mortality in 15 European cities. *Epidemiology* 2008;19(5):711-9.
12. Ishigami A, Hajat S, Kovats RS, Bisanti L, Rognoni M, Russo A, et al. An ecological time-series study of heat-related mortality in three European cities. *Environ Health* 2008;7:5.
13. Armstrong BG, Chalabi Z, Fenn B, Hajat S, Kovats S, Milojevic A, et al. Association of mortality with high temperatures in a temperate climate: England and Wales. *J Epidemiol Community Health* 2011;65(4):340-5.
